# Supplementary material for: The global ocean mixed layer depth derived from an energy approach
Source: Copernicus journal article supplement (doi:10.5194/egusphere-2024-4079), 2025-01-15
Supplement: Supplementary file 1 [file egusphere-2024-4079-supplement.pdf]

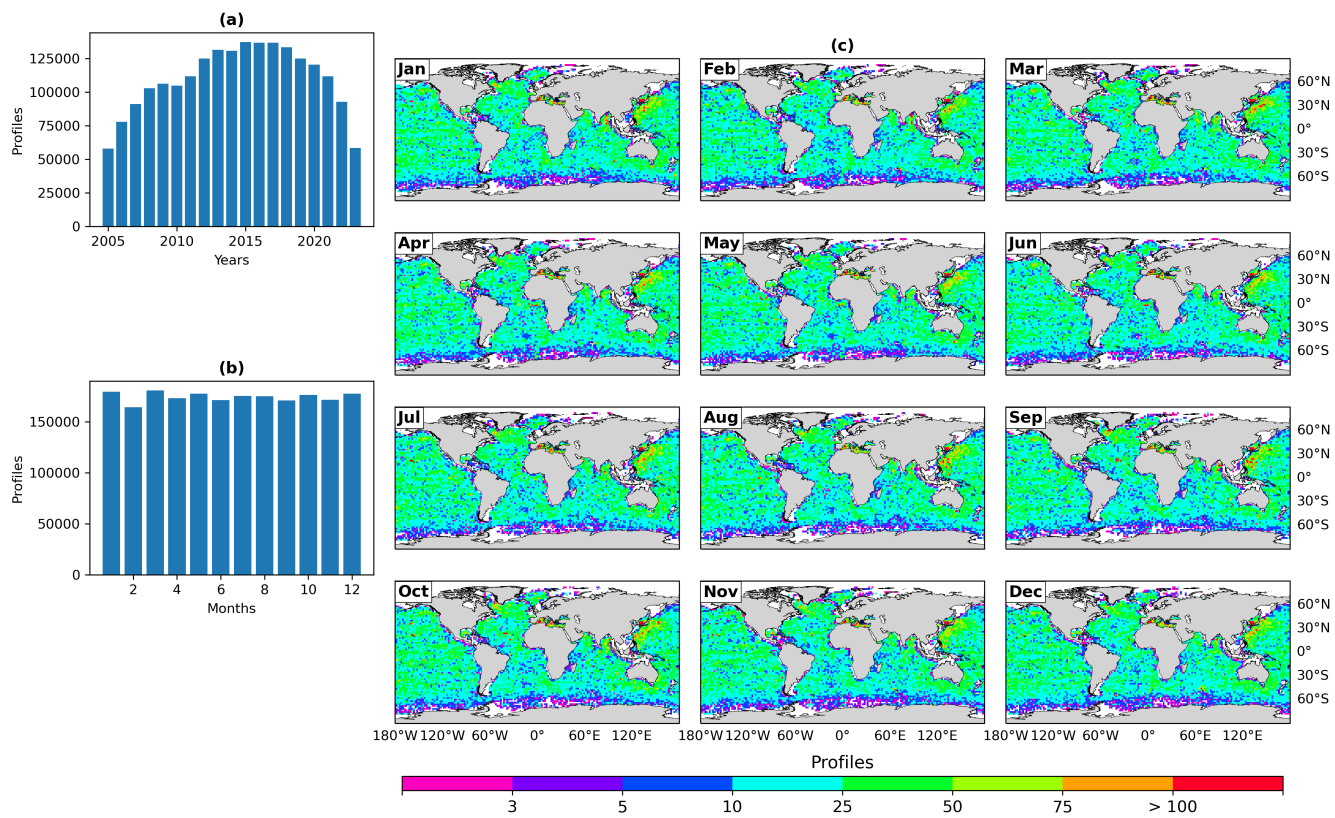

**Figure S1.** (a) Annual and (b) monthly histograms of the number of Argo profiles in the long-term record. (c) Monthly maps of the spatial distribution of the number of Argo profiles in the long-term record.

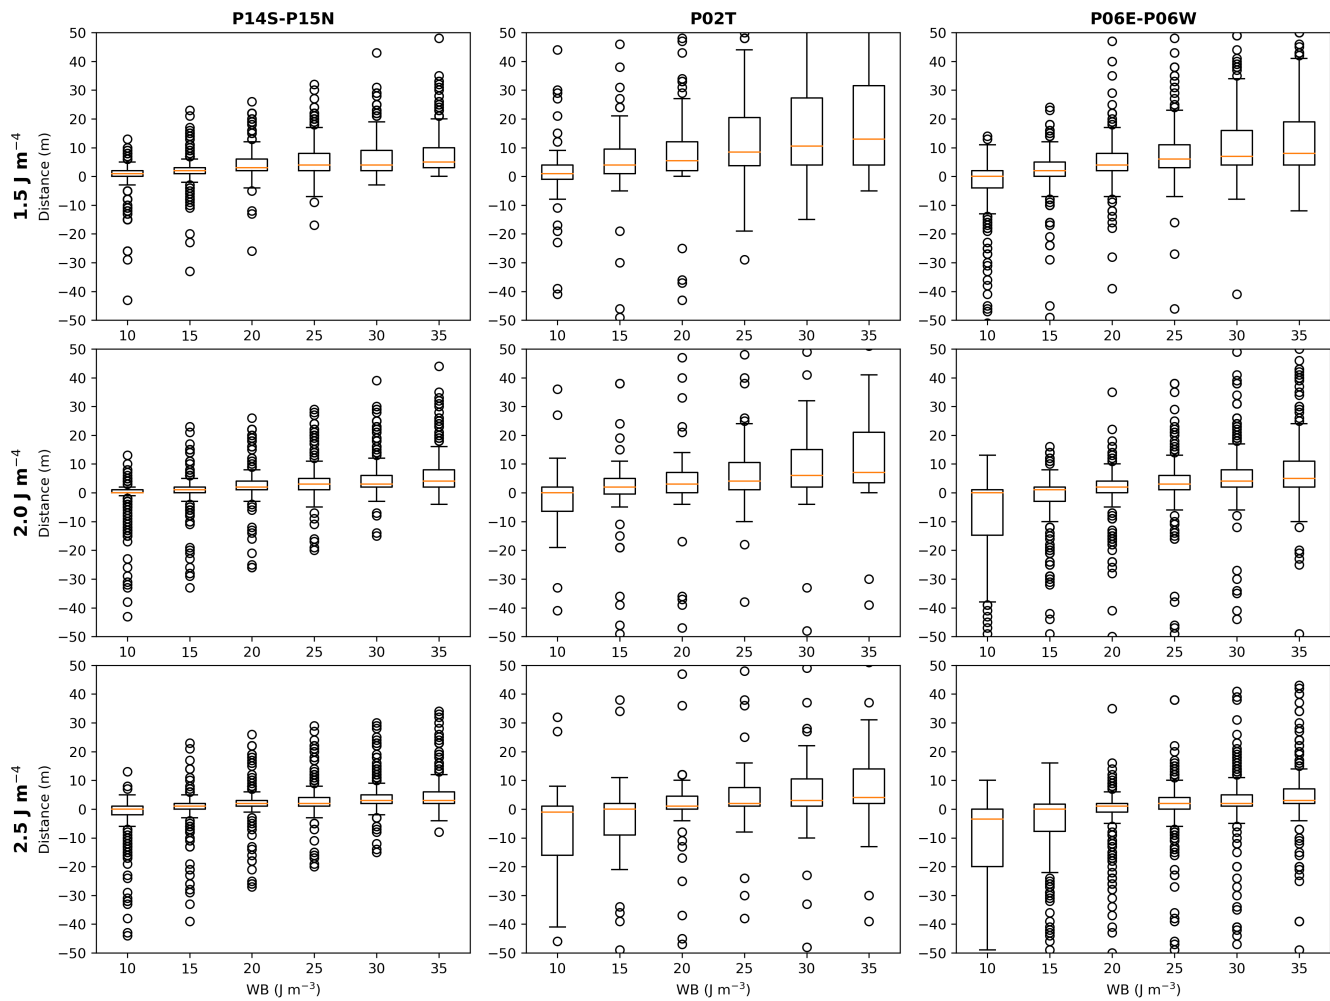

**Figure S2.** Boxplots of the differences in depth between the 1.5, 2.0, and 2.5  $\text{J m}^{-4}$   $\text{WB}_z$  isolines and the 10, 15, 20, 25, 30, and 35  $\text{J m}^{-3}$   $\text{WB}$  isolines in the section transects P14S-P15N, P02T, and P06E-P06W. The plots in each row correspond to a single  $\text{WB}_z$  isoline.

**Table S1.** MLD and the differences in  $\Theta$ ,  $\sigma_0$ , and WB from the MLD calculated with each methodology to the reference depth of 10 m. Results for the random profiles in the Southern Ocean shown in Fig. 4a-e.

| Method | Profile a |                                 |                                   |                          | Profile b |                                 |                                   |                          | Profile c |                                 |                                   |                          | Profile d |                                 |                                   |                          | Profile e |                                 |                                   |                          |
|--------|-----------|---------------------------------|-----------------------------------|--------------------------|-----------|---------------------------------|-----------------------------------|--------------------------|-----------|---------------------------------|-----------------------------------|--------------------------|-----------|---------------------------------|-----------------------------------|--------------------------|-----------|---------------------------------|-----------------------------------|--------------------------|
|        | MLD (m)   | $\Theta$ ( $^{\circ}\text{C}$ ) | $\sigma_0$ ( $\text{kg m}^{-3}$ ) | WB ( $\text{J m}^{-3}$ ) | MLD (m)   | $\Theta$ ( $^{\circ}\text{C}$ ) | $\sigma_0$ ( $\text{kg m}^{-3}$ ) | WB ( $\text{J m}^{-3}$ ) | MLD (m)   | $\Theta$ ( $^{\circ}\text{C}$ ) | $\sigma_0$ ( $\text{kg m}^{-3}$ ) | WB ( $\text{J m}^{-3}$ ) | MLD (m)   | $\Theta$ ( $^{\circ}\text{C}$ ) | $\sigma_0$ ( $\text{kg m}^{-3}$ ) | WB ( $\text{J m}^{-3}$ ) | MLD (m)   | $\Theta$ ( $^{\circ}\text{C}$ ) | $\sigma_0$ ( $\text{kg m}^{-3}$ ) | WB ( $\text{J m}^{-3}$ ) |
| B04T   | 395       | -0.20                           | 0.20                              | 519                      | 50        | -0.20                           | 0.09                              | 14                       | 378       | -0.20                           | 0.12                              | 306                      | 367       | -0.20                           | 0.12                              | 340                      | 139       | -0.20                           | 0.02                              | 21                       |
| B04D   | 147       | 0.30                            | 0.03                              | 39                       | 17        | -0.02                           | 0.03                              | 1                        | 222       | 0.20                            | 0.03                              | 49                       | 251       | -0.10                           | 0.03                              | 61                       | 152       | -0.21                           | 0.03                              | 28                       |
| HT09   | 139       | 0.01                            | 0.02                              | 25                       | 45        | -0.08                           | 0.08                              | 10                       | 222       | 0.20                            | 0.03                              | 49                       | 293       | 0.20                            | 0.05                              | 124                      | 139       | -0.20                           | 0.02                              | 21                       |
| R23    | 138       | 0.01                            | 0.02                              | 24                       | 54        | -0.24                           | 0.09                              | 17                       | nan       | nan                             | nan                               | nan                      | 237       | -0.18                           | 0.02                              | 48                       | 215       | -0.34                           | 0.04                              | 51                       |
| EBM    | 136       | 0.01                            | 0.01                              | 20                       | 63        | -0.27                           | 0.10                              | 20                       | 188       | -0.01                           | 0.01                              | 20                       | 198       | -0.07                           | 0.01                              | 20                       | 138       | -0.20                           | 0.02                              | 20                       |

**Table S2.** MLD and the differences in  $\Theta$ ,  $\sigma_0$ , and WB from the MLD calculated with each methodology to the reference depth of 10 m. Results for the random profiles in the North Atlantic shown in Fig. 4f-j.

| Method | Profile f |                                 |                                   |                          | Profile g |                                 |                                   |                          | Profile h |                                 |                                   |                          | Profile i |                                 |                                   |                          | Profile j |                                 |                                   |                          |
|--------|-----------|---------------------------------|-----------------------------------|--------------------------|-----------|---------------------------------|-----------------------------------|--------------------------|-----------|---------------------------------|-----------------------------------|--------------------------|-----------|---------------------------------|-----------------------------------|--------------------------|-----------|---------------------------------|-----------------------------------|--------------------------|
|        | MLD (m)   | $\Theta$ ( $^{\circ}\text{C}$ ) | $\sigma_0$ ( $\text{kg m}^{-3}$ ) | WB ( $\text{J m}^{-3}$ ) | MLD (m)   | $\Theta$ ( $^{\circ}\text{C}$ ) | $\sigma_0$ ( $\text{kg m}^{-3}$ ) | WB ( $\text{J m}^{-3}$ ) | MLD (m)   | $\Theta$ ( $^{\circ}\text{C}$ ) | $\sigma_0$ ( $\text{kg m}^{-3}$ ) | WB ( $\text{J m}^{-3}$ ) | MLD (m)   | $\Theta$ ( $^{\circ}\text{C}$ ) | $\sigma_0$ ( $\text{kg m}^{-3}$ ) | WB ( $\text{J m}^{-3}$ ) | MLD (m)   | $\Theta$ ( $^{\circ}\text{C}$ ) | $\sigma_0$ ( $\text{kg m}^{-3}$ ) | WB ( $\text{J m}^{-3}$ ) |
| B04T   | 76        | -0.20                           | 0.01                              | 5                        | 1440      | -0.20                           | 0.01                              | 27                       | 270       | -0.20                           | 0.07                              | 68                       | nan       | nan                             | nan                               | nan                      | nan       | nan                             | nan                               | nan                      |
| B04D   | 177       | -0.38                           | 0.03                              | 28                       | nan       | nan                             | nan                               | nan                      | 82        | -0.07                           | 0.03                              | 14                       | 84        | 0.45                            | 0.03                              | 14                       | 1432      | 0.29                            | 0.03                              | 372                      |
| HT09   | 176       | -0.38                           | 0.03                              | 28                       | 119       | -0.05                           | 0.01                              | 4                        | 82        | -0.07                           | 0.03                              | 13                       | 80        | 0.40                            | 0.03                              | 10                       | 1375      | 0.32                            | 0.02                              | 298                      |
| R23    | 202       | -0.41                           | 0.04                              | 38                       | nan       | nan                             | nan                               | nan                      | 423       | -0.31                           | 0.08                              | 107                      | 60        | 0.20                            | 0.01                              | 3                        | 1270      | 0.20                            | 0.01                              | 168                      |
| EBM    | 156       | -0.35                           | 0.02                              | 20                       | 1097      | -0.15                           | 0.01                              | 20                       | 93        | -0.08                           | 0.04                              | 20                       | 90        | 0.53                            | 0.04                              | 20                       | 1135      | 0.05                            | 0.00                              | 20                       |

**Table S3.** MLD and the differences in  $\Theta$ ,  $\sigma_0$ , and WB from the MLD calculated with each methodology to the reference depth of 10 m. Results for the random profiles in the subtropical eastern Pacific shown in Fig. 4k-o.

| Method | Profile k |                                 |                                   |                          | Profile l |                                 |                                   |                          | Profile m |                                 |                                   |                          | Profile n |                                 |                                   |                          | Profile o |                                 |                                   |                          |
|--------|-----------|---------------------------------|-----------------------------------|--------------------------|-----------|---------------------------------|-----------------------------------|--------------------------|-----------|---------------------------------|-----------------------------------|--------------------------|-----------|---------------------------------|-----------------------------------|--------------------------|-----------|---------------------------------|-----------------------------------|--------------------------|
|        | MLD (m)   | $\Theta$ ( $^{\circ}\text{C}$ ) | $\sigma_0$ ( $\text{kg m}^{-3}$ ) | WB ( $\text{J m}^{-3}$ ) | MLD (m)   | $\Theta$ ( $^{\circ}\text{C}$ ) | $\sigma_0$ ( $\text{kg m}^{-3}$ ) | WB ( $\text{J m}^{-3}$ ) | MLD (m)   | $\Theta$ ( $^{\circ}\text{C}$ ) | $\sigma_0$ ( $\text{kg m}^{-3}$ ) | WB ( $\text{J m}^{-3}$ ) | MLD (m)   | $\Theta$ ( $^{\circ}\text{C}$ ) | $\sigma_0$ ( $\text{kg m}^{-3}$ ) | WB ( $\text{J m}^{-3}$ ) | MLD (m)   | $\Theta$ ( $^{\circ}\text{C}$ ) | $\sigma_0$ ( $\text{kg m}^{-3}$ ) | WB ( $\text{J m}^{-3}$ ) |
| B04T   | 100       | -0.20                           | 0.21                              | 79                       | 117       | -0.20                           | 0.04                              | 31                       | 131       | -0.20                           | 0.04                              | 20                       | 44        | -0.20                           | 0.04                              | 6                        | 91        | -0.20                           | 0.07                              | 31                       |
| B04D   | 22        | -0.01                           | 0.03                              | 3                        | 98        | -0.15                           | 0.03                              | 19                       | 80        | -0.09                           | 0.03                              | 11                       | 34        | -0.14                           | 0.03                              | 3                        | 49        | -0.13                           | 0.03                              | 7                        |
| HT09   | 27        | 0.13                            | 0.11                              | 13                       | 98        | -0.15                           | 0.03                              | 19                       | 130       | -0.20                           | 0.04                              | 20                       | 34        | -0.14                           | 0.03                              | 3                        | 96        | -0.21                           | 0.08                              | 34                       |
| R23    | 76        | 0.04                            | 0.14                              | 25                       | 69        | -0.03                           | 0.01                              | 2                        | 89        | -0.11                           | 0.04                              | 15                       | 58        | -0.28                           | 0.05                              | 10                       | 88        | -0.19                           | 0.07                              | 29                       |
| EBM    | 50        | 0.09                            | 0.14                              | 20                       | 106       | -0.14                           | 0.03                              | 20                       | 108       | -0.17                           | 0.04                              | 20                       | 85        | -0.30                           | 0.07                              | 20                       | 71        | -0.19                           | 0.06                              | 20                       |

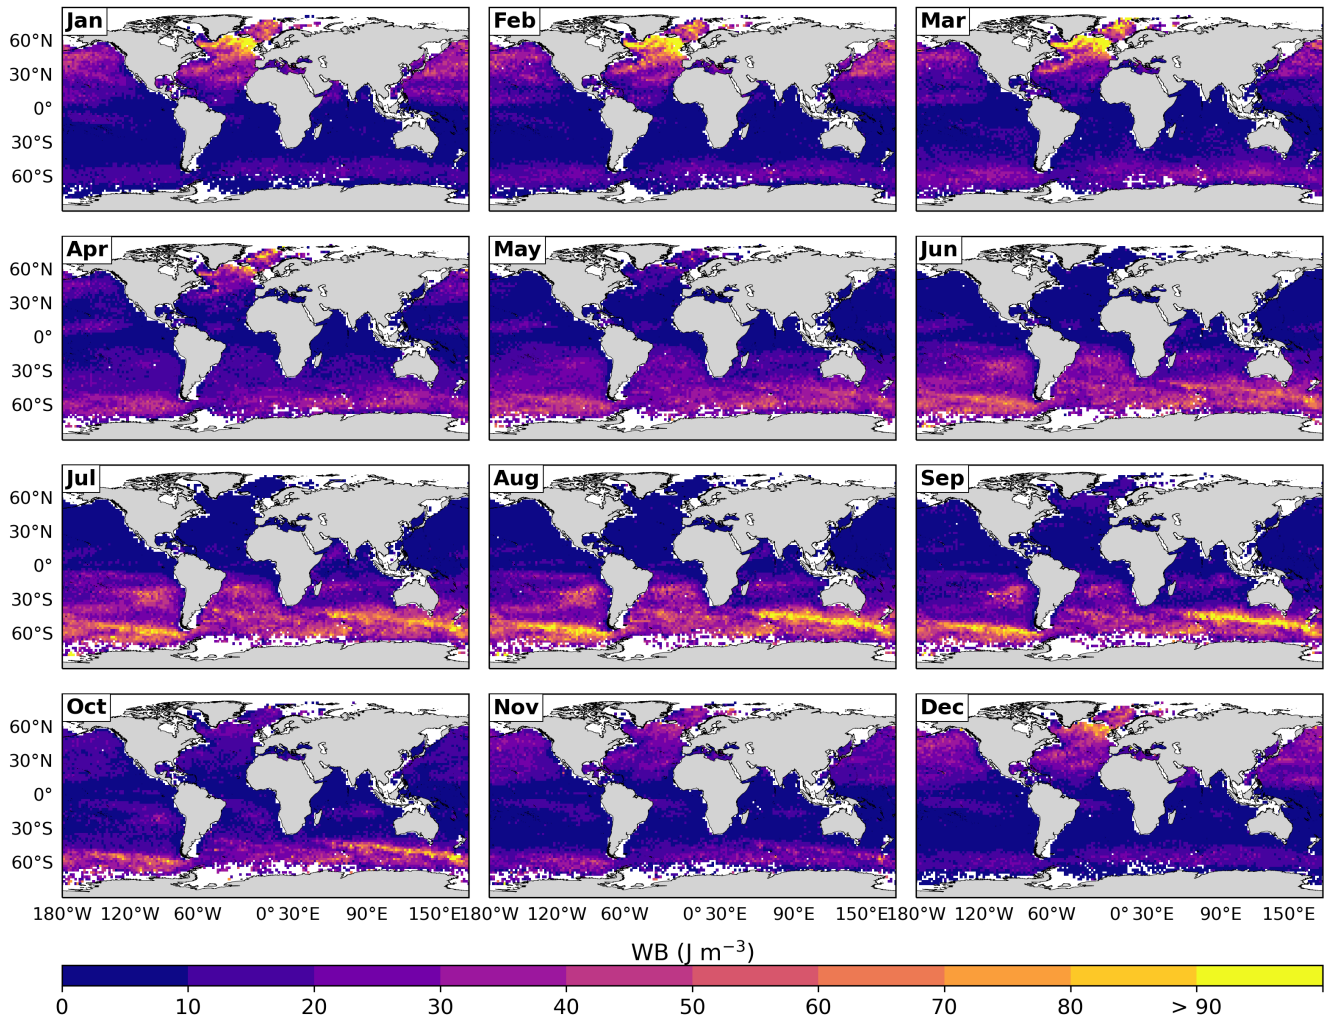

**Figure S3.** Global monthly climatology of the work done by buoyancy (WB) at the MLD calculated with B04D.

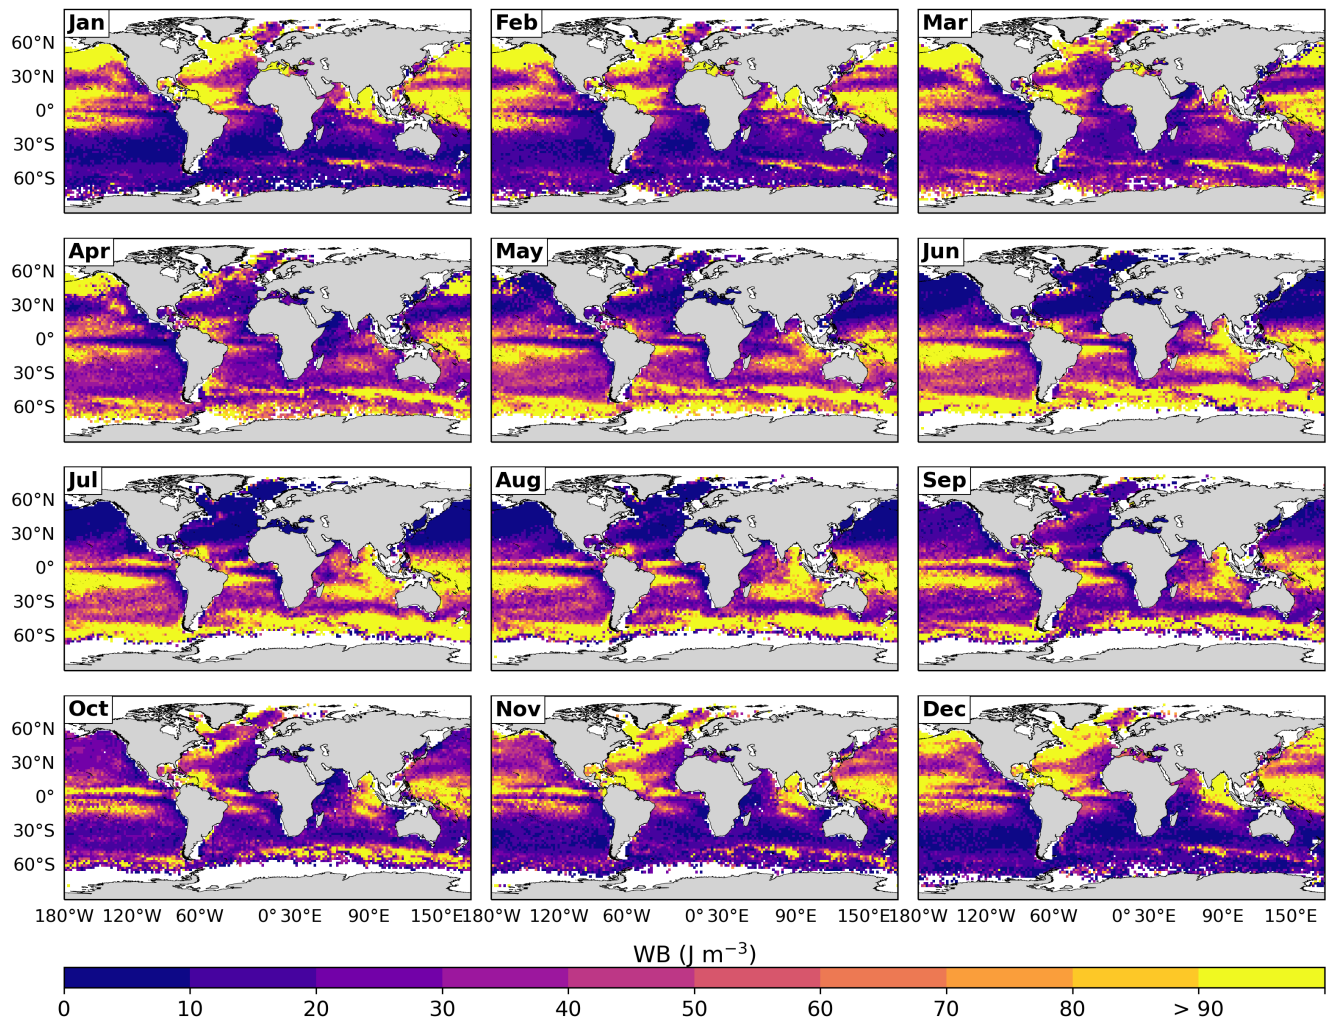

**Figure S4.** Global monthly climatology of the work done by buoyancy (WB) at the MLD calculated with B04T.

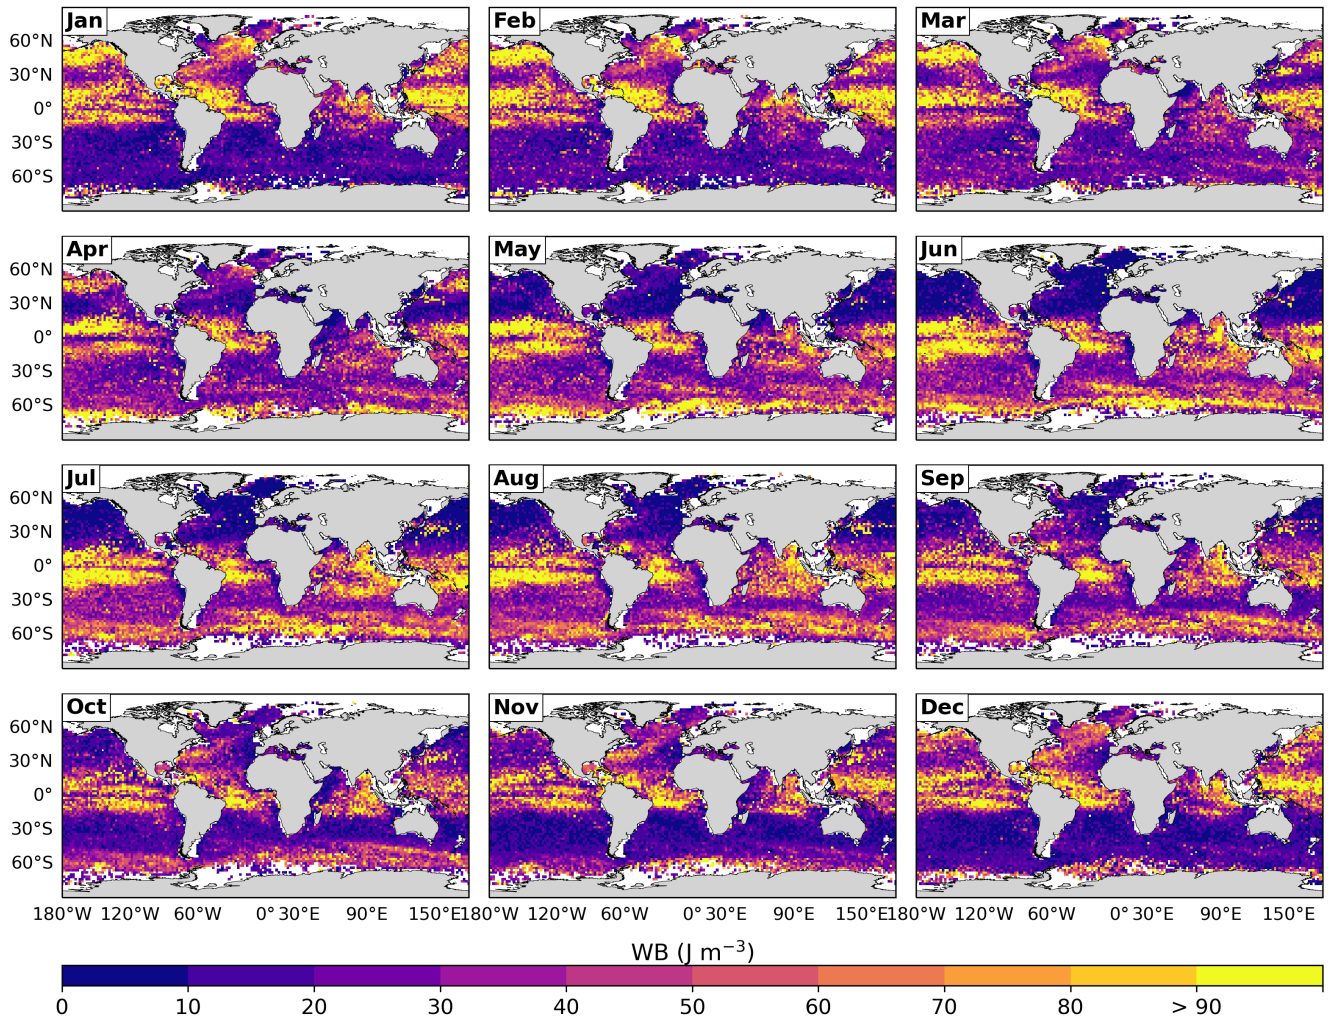

**Figure S5.** Global monthly climatology of the work done by buoyancy (WB) at the MLD calculated with HT09.

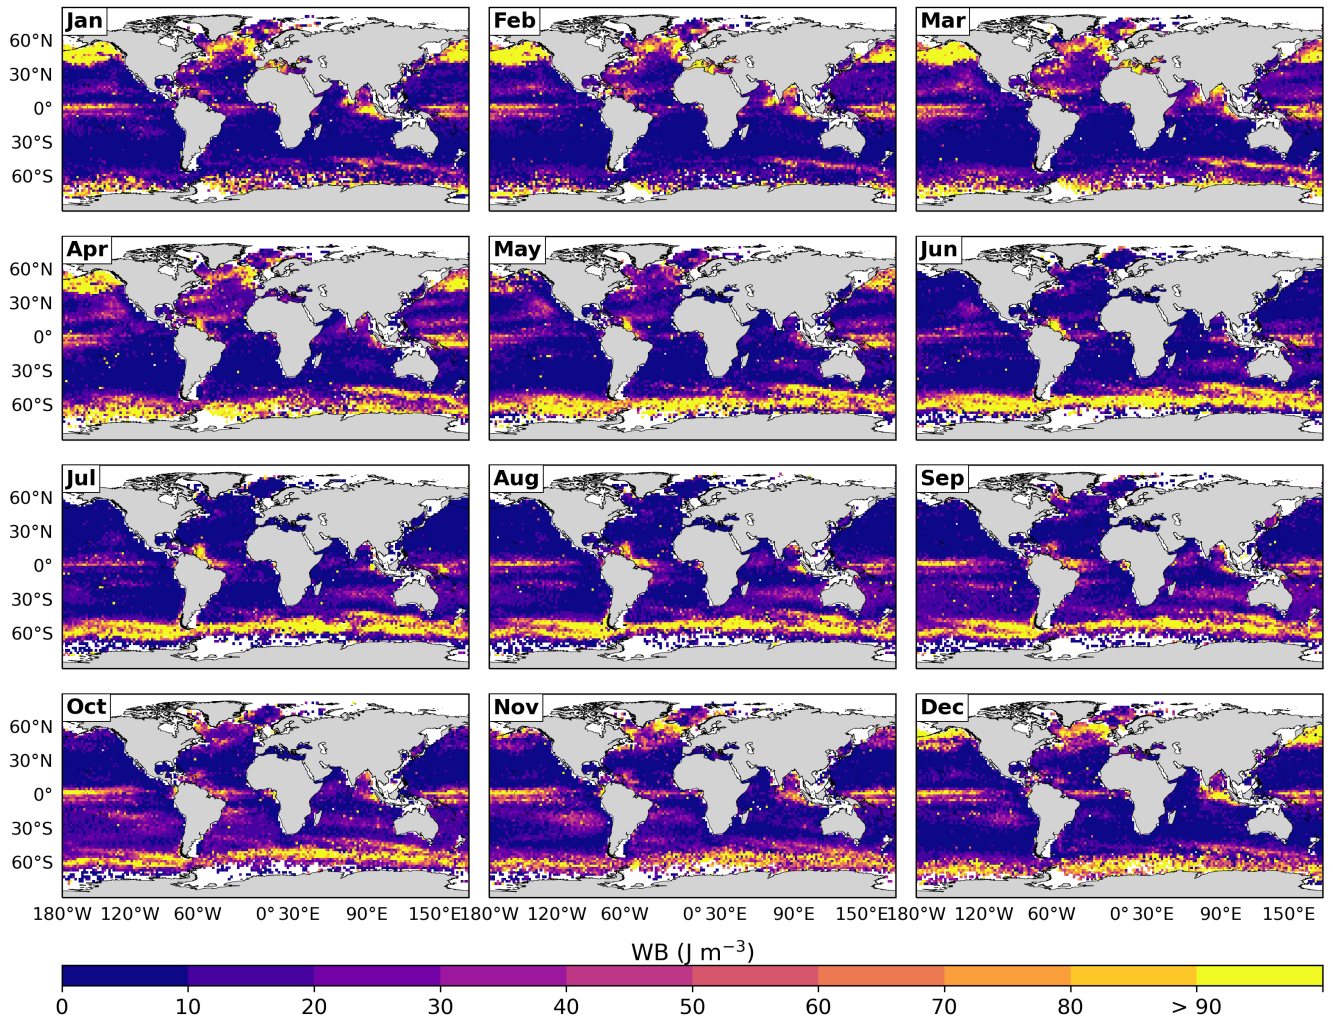

**Figure S6.** Global monthly climatology of the work done by buoyancy (WB) at the MLD calculated with R23.
